# Supplementary material
Source: PubMed Central journal article supplement (PMC8632406)
Supplement: mmc1.pdf [file mmc1.pdf]

## Supplemental Material

### S1. Optimal Ventilator Allocation under Varying Costs and Budgets

The appendix presents the results of sensitivity analysis on the cost of each ventilator, changing over \$10,000, \$15,000, and \$20,000. Table 10 in Subsection 6.4 of the main manuscript presents results for the number of ventilators allocated to each region under different budget levels when the ventilator unit cost is set as \$5,000. Tables S1, S2, and S3 show the optimal ventilator allocation when the ventilator unit cost is set as \$10,000, \$15,000, and \$20,000, respectively. The results include the number of ventilators allocated to each region at stages one and two and the total number of ventilators allocated throughout the planning horizon under different budget levels and three select scenarios. The “All Low,” “All Medium,” and “All High” scenarios represent low, medium, and high realization of the proportion of untested asymptomatic infections at each stage of a five-stage planning horizon, respectively. To analyze the impact of budget on the optimal ventilator allocation decisions, we select \$10M as the limited budget level, \$20M as the medium budget level, and \$30M as the ample budget level. The regions include New York County, Kings County, Queens County, Bronx County, and Richmond County in New York state and Hudson County, Bergen County, and Essex County in New Jersey state.

According to the results, the ventilator allocation decisions are similar under different ventilator costs, regardless of budget levels and scenarios. New York and Kings Counties receive almost the same number of ventilators allocated under different budget levels, scenarios, and ventilator costs. When the budget increases, Queens County receives more ventilators allocated under each scenario and ventilator cost. As shown in Table 10 in the main manuscript, Kings county has more ventilators allocated than in Tables S1-S3, and Queens county stays around 1,200 ventilators allocated for the majority of the cases under the unit ventilator cost of \$5,000. Thus, we can conclude that around 1,200 ventilators are enough for Queens County, and Kings County benefits more if more ventilators are available. For the rest of the counties, the number of ventilators allocated fluctuates in a small range under different scenarios. There are also increasing trends in the number of ventilators allocated when either the budget level increases or the cost for each ventilator reduces (e.g., Bronx county). As we reduce the cost of ventilators, the total number of ventilators allocated under each budget level increases, as expected.

Table S1: Optimal ventilator allocation under different scenarios and budgets with a unit ventilator cost of \$10,000

| Scenario     | County   | Stage          | Stage      | Total        | Stage          | Stage        | Total        | Stage          | Stage        | Total        |
|--------------|----------|----------------|------------|--------------|----------------|--------------|--------------|----------------|--------------|--------------|
|              |          | 1              | 2          | Ventilator   | 1              | 2            | Ventilator   | 1              | 2            | Ventilator   |
|              |          | (Budget=\$10M) |            |              | (Budget=\$20M) |              |              | (Budget=\$30M) |              |              |
| All Low      | New York | 0              | 0          | 0            | 0              | 0            | 0            | 0              | 0            | 0            |
|              | Kings    | 120            | 0          | 120          | 119            | 0            | 119          | 119            | 0            | 119          |
|              | Queens   | 104            | 1          | 105          | 107            | 1,072        | 1,179        | 105            | 1,120        | 1,225        |
|              | Bronx    | 27             | 76         | 103          | 29             | 0            | 29           | 566            | 450          | 1,016        |
|              | Richmond | 17             | 0          | 17           | 18             | 0            | 18           | 18             | 0            | 18           |
|              | Hudson   | 61             | 189        | 250          | 0              | 250          | 250          | 0              | 250          | 250          |
|              | Bergen   | 187            | 0          | 187          | 14             | 173          | 187          | 154            | 0            | 154          |
| Essex        | 218      | 0              | 218        | 218          | 0              | 218          | 0            | 218            | 218          |              |
| <b>Total</b> |          | <b>734</b>     | <b>266</b> | <b>1,000</b> | <b>505</b>     | <b>1,495</b> | <b>2,000</b> | <b>962</b>     | <b>2,038</b> | <b>3,000</b> |
| All Medium   | New York | 0              | 0          | 0            | 0              | 0            | 0            | 0              | 1            | 1            |
|              | Kings    | 120            | 0          | 120          | 119            | 0            | 119          | 119            | 0            | 119          |
|              | Queens   | 104            | 1          | 105          | 107            | 0            | 107          | 105            | 1,120        | 1,225        |
|              | Bronx    | 27             | 1          | 28           | 29             | 808          | 837          | 566            | 152          | 718          |
|              | Richmond | 17             | 0          | 17           | 18             | 0            | 18           | 18             | 0            | 18           |
|              | Hudson   | 61             | 0          | 61           | 0              | 250          | 250          | 0              | 250          | 250          |
|              | Bergen   | 187            | 264        | 451          | 14             | 437          | 451          | 154            | 297          | 451          |
| Essex        | 218      | 0              | 218        | 218          | 0              | 218          | 0            | 218            | 218          |              |
| <b>Total</b> |          | <b>734</b>     | <b>266</b> | <b>1,000</b> | <b>505</b>     | <b>1,495</b> | <b>2,000</b> | <b>962</b>     | <b>2,038</b> | <b>3,000</b> |
| All High     | New York | 0              | 0          | 0            | 0              | 0            | 0            | 0              | 0            | 0            |
|              | Kings    | 120            | 0          | 120          | 119            | 0            | 119          | 119            | 0            | 119          |
|              | Queens   | 104            | 1          | 105          | 107            | 1,053        | 1,160        | 105            | 1,120        | 1,225        |
|              | Bronx    | 27             | 1          | 28           | 29             | 0            | 29           | 566            | 0            | 566          |
|              | Richmond | 17             | 0          | 17           | 18             | 5            | 23           | 18             | 404          | 422          |
|              | Hudson   | 61             | 0          | 61           | 0              | 0            | 0            | 0              | 0            | 0            |
|              | Bergen   | 187            | 264        | 451          | 14             | 437          | 451          | 154            | 296          | 450          |
| Essex        | 218      | 0              | 218        | 218          | 0              | 218          | 0            | 218            | 218          |              |
| <b>Total</b> |          | <b>734</b>     | <b>266</b> | <b>1,000</b> | <b>505</b>     | <b>1,495</b> | <b>2,000</b> | <b>962</b>     | <b>2,038</b> | <b>3,000</b> |

Table S2: Optimal ventilator allocation under different scenarios and budgets with a unit ventilator cost of \$15,000

| Scenario     | County   | Stage          | Stage      | Total      | Stage          | Stage      | Total        | Stage          | Stage        | Total        |
|--------------|----------|----------------|------------|------------|----------------|------------|--------------|----------------|--------------|--------------|
|              |          | 1              | 2          | Ventilator | 1              | 2          | Ventilator   | 1              | 2            | Ventilator   |
|              |          | (Budget=\$10M) |            |            | (Budget=\$20M) |            |              | (Budget=\$30M) |              |              |
| All Low      | New York | 0              | 0          | 0          | 0              | 0          | 0            | 0              | 0            | 0            |
|              | Kings    | 120            | 0          | 120        | 120            | 0          | 120          | 119            | 0            | 119          |
|              | Queens   | 105            | 0          | 105        | 105            | 0          | 105          | 105            | 1,120        | 1,225        |
|              | Bronx    | 28             | 0          | 28         | 172            | 264        | 436          | 28             | 0            | 28           |
|              | Richmond | 18             | 0          | 18         | 17             | 0          | 17           | 18             | 0            | 18           |
|              | Hudson   | 0              | 165        | 165        | 0              | 250        | 250          | 0              | 250          | 250          |
|              | Bergen   | 14             | 0          | 14         | 14             | 173        | 187          | 14             | 128          | 142          |
| Essex        | 4        | 212            | 216        | 218        | 0              | 218        | 0            | 218            | 218          |              |
| <b>Total</b> |          | <b>289</b>     | <b>377</b> | <b>666</b> | <b>646</b>     | <b>687</b> | <b>1,333</b> | <b>284</b>     | <b>1,716</b> | <b>2,000</b> |
| All Medium   | New York | 0              | 0          | 0          | 0              | 0          | 0            | 0              | 0            | 0            |
|              | Kings    | 120            | 0          | 120        | 120            | 0          | 120          | 119            | 0            | 119          |
|              | Queens   | 105            | 0          | 105        | 105            | 0          | 105          | 105            | 985          | 1,090        |
|              | Bronx    | 28             | 0          | 28         | 172            | 0          | 172          | 28             | 44           | 72           |
|              | Richmond | 18             | 0          | 18         | 17             | 0          | 17           | 18             | 0            | 18           |
|              | Hudson   | 0              | 0          | 0          | 0              | 250        | 250          | 0              | 250          | 250          |
|              | Bergen   | 14             | 377        | 391        | 14             | 437        | 451          | 14             | 437          | 451          |
| Essex        | 4        | 0              | 4          | 218        | 0              | 218        | 0            | 0              | 0            |              |
| <b>Total</b> |          | <b>289</b>     | <b>377</b> | <b>666</b> | <b>646</b>     | <b>687</b> | <b>1,333</b> | <b>284</b>     | <b>1,716</b> | <b>2,000</b> |
| All High     | New York | 0              | 0          | 0          | 0              | 0          | 0            | 0              | 0            | 0            |
|              | Kings    | 120            | 0          | 120        | 120            | 0          | 120          | 119            | 0            | 119          |
|              | Queens   | 105            | 0          | 105        | 105            | 250        | 355          | 105            | 136          | 241          |
|              | Bronx    | 28             | 0          | 28         | 172            | 0          | 172          | 28             | 925          | 953          |
|              | Richmond | 18             | 0          | 18         | 17             | 0          | 17           | 18             | 0            | 18           |
|              | Hudson   | 0              | 0          | 0          | 0              | 0          | 0            | 0              | 0            | 0            |
|              | Bergen   | 14             | 377        | 391        | 14             | 437        | 451          | 14             | 437          | 451          |
| Essex        | 4        | 0              | 4          | 218        | 0              | 218        | 0            | 218            | 218          |              |
| <b>Total</b> |          | <b>289</b>     | <b>377</b> | <b>666</b> | <b>646</b>     | <b>687</b> | <b>1,333</b> | <b>284</b>     | <b>1,716</b> | <b>2,000</b> |

Table S3: Optimal ventilator allocation under different scenarios and budgets with a unit ventilator cost of \$20,000

| Scenario     | County   | Stage          | Stage    | Total      | Stage          | Stage      | Total        | Stage          | Stage      | Total        |
|--------------|----------|----------------|----------|------------|----------------|------------|--------------|----------------|------------|--------------|
|              |          | 1              | 2        | Ventilator | 1              | 2          | Ventilator   | 1              | 2          | Ventilator   |
|              |          | (Budget=\$10M) |          |            | (Budget=\$20M) |            |              | (Budget=\$30M) |            |              |
| All Low      | New York | 0              | 0        | 0          | 0              | 0          | 0            | 0              | 0          | 0            |
|              | Kings    | 120            | 0        | 120        | 120            | 0          | 120          | 120            | 0          | 120          |
|              | Queens   | 105            | 0        | 105        | 104            | 1          | 105          | 106            | 570        | 676          |
|              | Bronx    | 28             | 0        | 28         | 27             | 76         | 103          | 28             | 4          | 32           |
|              | Richmond | 18             | 0        | 18         | 17             | 0          | 17           | 18             | 0          | 18           |
|              | Hudson   | 0              | 3        | 3          | 61             | 189        | 250          | 250            | 0          | 250          |
|              | Bergen   | 13             | 0        | 13         | 187            | 0          | 187          | 14             | 172        | 186          |
| Essex        | 213      | 0              | 213      | 218        | 0              | 218        | 0            | 218            | 218        |              |
| <b>Total</b> |          | <b>497</b>     | <b>3</b> | <b>500</b> | <b>734</b>     | <b>266</b> | <b>1,000</b> | <b>536</b>     | <b>964</b> | <b>1,500</b> |
| All Medium   | New York | 0              | 0        | 0          | 0              | 0          | 0            | 0              | 0          | 0            |
|              | Kings    | 120            | 0        | 120        | 120            | 0          | 120          | 120            | 0          | 120          |
|              | Queens   | 105            | 0        | 105        | 104            | 1          | 105          | 106            | 308        | 414          |
|              | Bronx    | 28             | 0        | 28         | 27             | 1          | 28           | 28             | 0          | 28           |
|              | Richmond | 18             | 0        | 18         | 17             | 0          | 17           | 18             | 0          | 18           |
|              | Hudson   | 0              | 0        | 0          | 61             | 0          | 61           | 250            | 0          | 250          |
|              | Bergen   | 13             | 3        | 16         | 187            | 264        | 451          | 14             | 437        | 451          |
| Essex        | 213      | 0              | 213      | 218        | 0              | 218        | 0            | 219            | 219        |              |
| <b>Total</b> |          | <b>497</b>     | <b>3</b> | <b>500</b> | <b>734</b>     | <b>266</b> | <b>1,000</b> | <b>536</b>     | <b>964</b> | <b>1,500</b> |
| All High     | New York | 0              | 0        | 0          | 0              | 0          | 0            | 0              | 0          | 0            |
|              | Kings    | 120            | 0        | 120        | 120            | 0          | 120          | 120            | 0          | 120          |
|              | Queens   | 105            | 0        | 105        | 104            | 1          | 105          | 106            | 570        | 676          |
|              | Bronx    | 28             | 0        | 28         | 27             | 76         | 103          | 28             | 4          | 32           |
|              | Richmond | 18             | 0        | 18         | 17             | 0          | 17           | 18             | 0          | 18           |
|              | Hudson   | 0              | 3        | 3          | 61             | 189        | 250          | 250            | 0          | 250          |
|              | Bergen   | 13             | 0        | 13         | 187            | 0          | 187          | 14             | 172        | 186          |
| Essex        | 213      | 0              | 213      | 218        | 0              | 218        | 0            | 218            | 218        |              |
| <b>Total</b> |          | <b>497</b>     | <b>3</b> | <b>500</b> | <b>734</b>     | <b>266</b> | <b>1,000</b> | <b>536</b>     | <b>964</b> | <b>1,500</b> |
